# Supplementary material for: Characterization of Four Novel dsRNA Viruses Isolated from Mucor hiemalis Strains
Source: MDPI journal article supplement (doi:10.3390/v13112319), 2021-11-21
Supplement: s1 [file s1]

**Supplementary Table S3.** Amino acid sequence identities of the MhV1a/b CP, MhV1a/b RdRp, MhV2 CP, MhV2 RdRp, MhV3 CP, MhV3 RdRp, MhV4 CP and MhV4 RdRp with the most similar sequences deduced by the BLAST search of the NCBI database.

| Virus           | Virus name                                        | Accession number | Identity (%) | E-Value | Query Coverage (%) |
|-----------------|---------------------------------------------------|------------------|--------------|---------|--------------------|
| MhV1a/b<br>CP   | Thelebolus microsporus totivirus 1 CP             | AZT88642.1       | 49.65        | 0       | 89                 |
|                 | Tolypocladium ophioglossoides totivirus 1 CP      | AZT88644.1       | 44.64        | 0       | 90                 |
|                 | Beauveria bassiana victorivirus 1 CP              | AMQ11130.1       | 44.00        | 0       | 89                 |
|                 | Bipolaris maydis victorivirus 1 CP                | AXB26763.1       | 44.58        | 0       | 91                 |
|                 | Helminthosporium victoriae virus 190S CP          | NP_619669.2      | 44.71        | 0       | 91                 |
| MhV1a/b<br>RdRp | Umbelopsis ramanniana virus 2 RdRp, partial       | VFI65724.1       | 100          | 0       | 100                |
|                 | Thelebolus microsporus totivirus 1 RdRp           | AZT88643.1       | 52.39        | 0       | 94                 |
|                 | Tolypocladium ophioglossoides totivirus 1 RdRp    | AZT88645.1       | 48.53        | 0       | 94                 |
|                 | Ustilaginoidea virens RNA virus 5 RdRp            | YP_009182167.1   | 47.04        | 0       | 100                |
|                 | Helicobasidium mompa totivirus 1-17 RdRp          | NP_898833.1      | 44.43        | 0       | 92                 |
| MhV2<br>CP      | Ustilaginoidea virens RNA virus putative CP       | YP_007761588.1   | 40.22        | 1e-159  | 90                 |
|                 | Alternaria arborescens victorivirus 1 putative CP | YP_009553477.1   | 35.91        | 4e-75   | 67                 |
|                 | Beauveria bassiana victorivirus 1 CP              | AMQ11130.1       | 33.87        | 5e-74   | 69                 |
|                 | Coniothyrium minitans RNA virus putative CP       | ALM62230.1       | 35.54        | 7e-74   | 67                 |
|                 | Helicobasidium mompa totivirus 1-17 CP            | NP_898832.1      | 32.78        | 9e-74   | 83                 |
| MhV2<br>RdRp    | Ustilaginoidea virens RNA virus 1 putative RdRp   | YP_007761589.1   | 37.28        | 2e-160  | 99                 |
|                 | Diatom colony associated dsRNA virus 11 RdRp      | YP_009552795.1   | 36.03        | 5e-149  | 100                |
|                 | Thelebolus microsporus totivirus 1 RdRp           | AZT88643.1       | 35.43        | 5e-144  | 98                 |
|                 | Umbelopsis ramanniana virus 2 RdRp, partial       | VFI65724.1       | 37.28        | 6e-142  | 94                 |
|                 | Tolypocladium ophioglossoides totivirus 1 RdRp    | AZT88645.1       | 33.61        | 1e-134  | 98                 |
| MhV3            | Nigrospora oryzae victorivirus 1 CP               | YP_009254735.1   | 36.85        | 8e-117  | 93                 |

|              |                                                                  |                |       |        |     |
|--------------|------------------------------------------------------------------|----------------|-------|--------|-----|
| CP           | Alternaria alternata victorivirus 1 CP                           | BBJ77935.1     | 34.83 | 9e-114 | 94  |
|              | Penicillium aurantiogriseum totivirus 1 CP                       | YP_009212847.1 | 39.75 | 2e-113 | 75  |
|              | Alternaria arborescens victorivirus 1 putative CP                | YP_009553477.1 | 39.43 | 2e-112 | 74  |
|              | Aspergillus homomorphus totivirus 1 CP                           | AZT88628.1     | 37.48 | 4e-112 | 85  |
| MhV3<br>RdRp | Diatom colony associated dsRNA virus 10 RdRp                     | YP_009552793.1 | 38.91 | 2e-161 | 99  |
|              | Diatom colony associated dsRNA virus 11 RdRp                     | YP_009552795.1 | 37.53 | 4e-160 | 97  |
|              | Colletotrichum zoysiae totivirus 1 RdRp                          | AZT88637.1     | 36.21 | 6e-156 | 98  |
|              | Umbelopsis ramanniana virus 2 RdRp, partial                      | VFI65724.1     | 38.37 | 2e-154 | 93  |
|              | Diatom colony associated dsRNA virus 7 RdRp                      | YP_009553338.1 | 36.15 | 2e-152 | 95  |
| MhV4<br>CP   | Trichoderma koningiopsis totivirus 1 CP                          | QGA70770.1     | 86.17 | 0      | 100 |
|              | Wuhan insect virus 26 hypothetical protein 1                     | YP_009342427.1 | 51.01 | 0      | 78  |
|              | Totiviridae sp. hypothetical protein H4Bulk46889_000002, partial | QDH88821.1     | 41.54 | 2e-174 | 96  |
|              | Wuhan insect virus 27 hypothetical protein 1                     | YP_009342433.1 | 37.86 | 3e-154 | 96  |
|              | Plasmopara viticola associated totivirus 3 putative CP           | QGY72631.1     | 35.30 | 2e-138 | 99  |
| MhV4<br>RdRp | Trichoderma koningiopsis totivirus 1 RdRp                        | QGA70771.1     | 90.35 | 0      | 96  |
|              | Umbelopsis ramanniana virus 4 RdRp                               | VUD77425.1     | 59.69 | 0      | 99  |
|              | Wuhan insect virus 26 hypothetical protein 2                     | YP_009342428.1 | 57.70 | 0      | 99  |
|              | Wuhan insect virus 27 hypothetical protein 2                     | YP_009342434.1 | 52.30 | 0      | 100 |
|              | Delisea pulchra totivirus IndA RdRp, partial                     | AMB17470.1     | 46.75 | 0      | 90  |
