# Supplementary material for: Characterization of Four Novel dsRNA Viruses Isolated from Mucor hiemalis Strains
Source: MDPI journal article supplement (doi:10.3390/v13112319), 2021-11-21
Supplement: s1 [file s1]

**Supplementary Table S2** List of primers applying for amplification of cDNAs and hybridization probes.

| Primer*     | Sequence (5' - 3')                                                 | Application                                      | Reference              |                                                                              |
|-------------|--------------------------------------------------------------------|--------------------------------------------------|------------------------|------------------------------------------------------------------------------|
| PC3-T7 loop | p-GGATCCCGGAATTCGGTAATACGACT<br>CACTATATTTTATAGTGAGTCGTATTA-<br>OH | self-priming anchor primer for<br>cDNA synthesis | Potgieter et al., 2009 |                                                                              |
| PC2         | p-CCGAATTCCTCGGGATCC                                               | Amplification of cDNA                            | Potgieter et al., 2009 |                                                                              |
| MhV1CP F    | CACTCTACCCTTCAACTTCAACC                                            | Amplification of probe for<br>MhV1 CP            | In this study          | *<br><br>F and R indicating<br>forward and reverse<br>primers, respectively. |
| MhV1CP R    | TAGACACCGATGTTGTAGTGGA                                             |                                                  |                        |                                                                              |
| MhV1RdRp F  | ACCCGTTCCATCTTCCCT                                                 | Amplification of probe for<br>MhV1 RdRp          | In this study          |                                                                              |
| MhV1RdRp R  | TGTTTCCAGCAAGGTCGG                                                 |                                                  |                        |                                                                              |
| MhV2CP F    | CCTACCGAACCACCGAAATGTC                                             | Amplification of probe for<br>MhV2 CP            | In this study          |                                                                              |
| MhV2CP R    | CTGATAAGATCCCTGCCACGA                                              |                                                  |                        |                                                                              |
| MhV2RdRp F  | TTTGGACTTCACGCTGGTTATGG                                            | Amplification of probe for<br>MhV2 RdRp          | In this study          |                                                                              |
| MhV2RdRp R  | GCCCTTTCAGACCTCTTCG                                                |                                                  |                        |                                                                              |
| MhV3CP F    | ACACTCGTTTGCGTTCTTATTCTG                                           | Amplification of probe for<br>MhV3 CP            | In this study          |                                                                              |
| MhV3CP R    | CCTCACTGACACCAGAAATGC                                              |                                                  |                        |                                                                              |
| MhV3RdRp F  | GTGGTGTTGGTGAGATTGATTGTC                                           | Amplification of probe for<br>MhV3 RdRp          | In this study          |                                                                              |
| MhV3RdRp R  | CGTTCAACCATGCCAACAAGAC                                             |                                                  |                        |                                                                              |
| MhV4CP F    | ACACTCTGATACATAACGAAGCCA                                           | Amplification of probe for<br>MhV4 CP            | In this study          |                                                                              |
| MhV4CP R    | ATCGTTGACCATAGTTCCCAAGAC                                           |                                                  |                        |                                                                              |
| MhV4RdRp F  | TTTGCCTAAGCTACCGTTCAACC                                            | Amplification of probe for<br>MhV4 RdRp          | In this study          |                                                                              |
| MhV4RdRp R  | AACATAAGTAGTCAGTCTCCAGCC                                           |                                                  |                        |                                                                              |

|               |                          |                                         |               |
|---------------|--------------------------|-----------------------------------------|---------------|
| MhV1a/b_KN_R5 | GGAAATCCTCGGAACCCTCC     | Amplification of 5' terminus of MhV1a/b | In this study |
| MhV1a/b_KN_F3 | GCCTACCCTCGCTTCAAAGC     | Amplification of 3' terminus of MhV1a/b | In this study |
| MhV2_KN_R5    | GCTCGCATAGCTGGGTCAG      | Amplification of 5' terminus of MhV2    | In this study |
| MhV2_KN_F3    | GGTCATGGTAGAGTCTTCATTCTC | Amplification of 3' terminus of MhV2    | In this study |
| MhV3_KN_R5    | ACTCACTTGAATTGAACAGTCACC | Amplification of 5' terminus of MhV3    | In this study |
| MhV3_KN_F3    | TATGTCACCTGTTATTTCTGCTCG | Amplification of 3' terminus of MhV3    | In this study |
| MhV4_KN_R5    | GTGCCTGTGTATAAAGCCGA     | Amplification of 5' terminus of MhV4    | In this study |
| MhV4_KN_F3    | TGGTCAAAGAGAAAGGTCAG     | Amplification of 3' terminus of MhV4    | In this study |

---
