# Supplementary material for: Characterization of Four Novel dsRNA Viruses Isolated from Mucor hiemalis Strains
Source: MDPI journal article supplement (doi:10.3390/v13112319), 2021-11-21
Supplement: s1 [file s1]

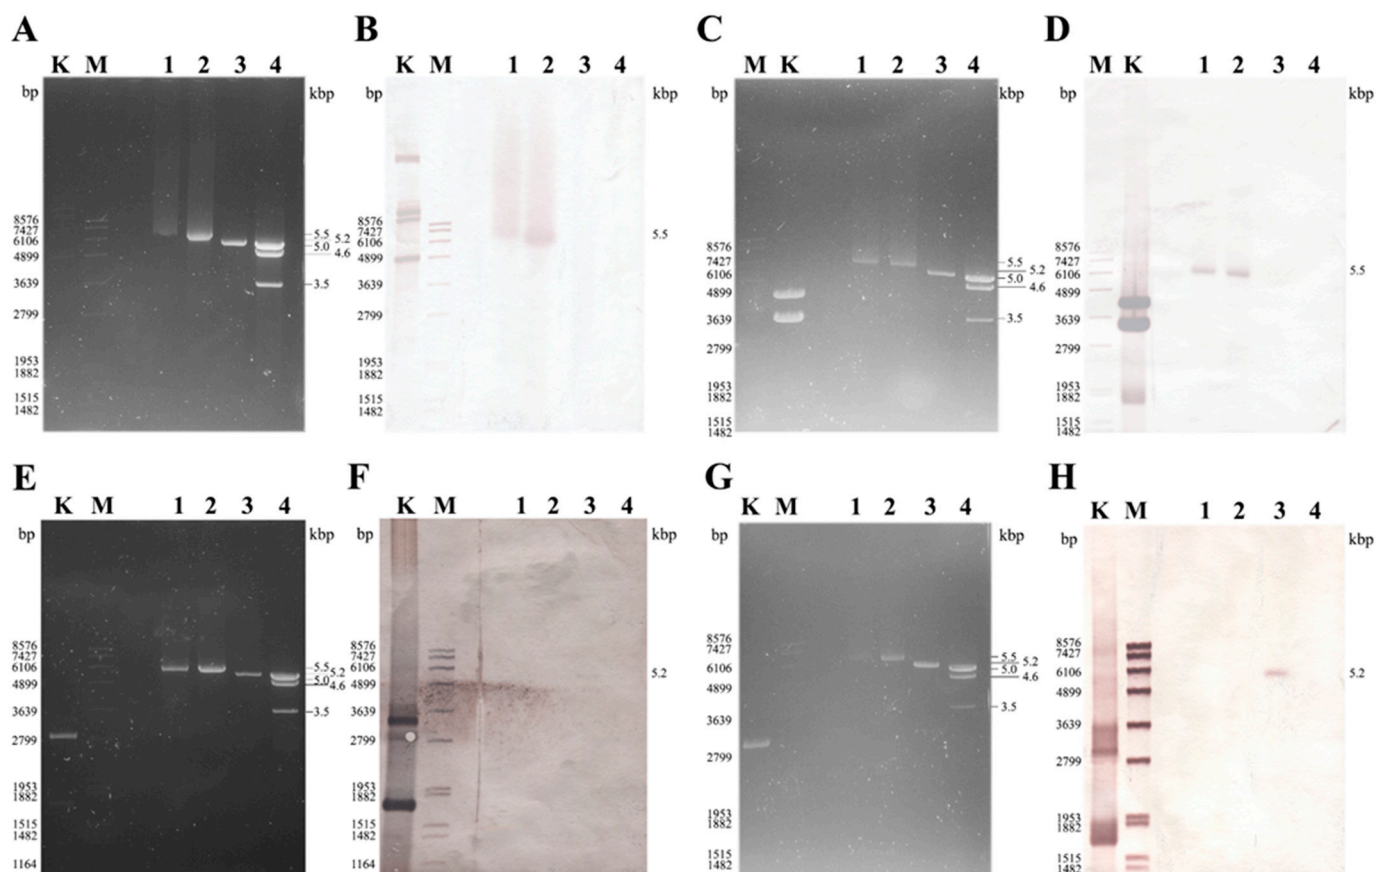

**Supplementary Figure S3.** Northern blot analysis of dsRNA molecules purified from the mycovirus-harboring *Mucor* strains with probes designed using the MhV1a and MhV2 sequences. Panels (A), (C), (E) and (G), agarose gel electrophoresis of dsRNA molecules extracted from *M. hiemalis* f. *hiemalis* WRL CN(M) 122, *M. hiemalis* f. *hiemalis* NRRL 3624, *M. hiemalis* f. *corticola* NRRL 3617 and *M. hiemalis* f. *corticola* NRRL 3616. Lane K, control plasmid containing the corresponding PCR amplicon of virus genomes; Lane M, DIG-labeled DNA Molecular Weight Marker VII (Roche); Lane 1, *M. hiemalis* f. *hiemalis* WRL CN(M) 122; Lane 2, *M. hiemalis* f. *hiemalis* NRRL 3624; Lane 3, *M. hiemalis* f. *corticola* NRRL 3617; Lane 4, *M. hiemalis* f. *corticola* NRRL 3616. Right numbers indicate the sizes (kbp) of the detected dsRNA molecules. Panels (B) and (D), Northern blot analysis of *M. hiemalis* f. *hiemalis* WRL CN(M) 122 dsRNA molecules hybridized with MhV1a CP and MhV1a RdRp probes, respectively. MhV1a CP and MhV1a RdRp probes both gave strong hybridization signal with the 5.5-kbp molecules of *M. hiemalis* f. *hiemalis* WRL CN(M) 122 and *M. hiemalis* f. *hiemalis* NRRL 3624 since both contain the genome variants of the same virus species. The *Cla*I digested control plasmid, which contains the PCR amplicon of the MhV1a CP and RdRp probes, gave strong hybridization signal with the MhV1a CP and MhV1a RdRp probes. Panels (F) and (H), Northern blot analysis of *M. hiemalis* f. *corticola* NRRL 3617 dsRNA molecules hybridized with MhV2 CP and MhV2 RdRp probes, respectively. MhV2 CP and MhV2 RdRp probes gave a strong hybridization signal with the 5.2-kbp molecules purified from *M. hiemalis* f. *corticola* NRRL 3617. The *Bgl*III digested control plasmid, which contains the PCR amplicon of the MhV2 CP and the MhV2 RdRp, gave a strong hybridization signal with the corresponding probe.
