# Supplementary material for: Characterization of Four Novel dsRNA Viruses Isolated from Mucor hiemalis Strains
Source: MDPI journal article supplement (doi:10.3390/v13112319), 2021-11-21
Supplement: s1 [file s1]

**Supplementary Table S1** Sequence identities of proteins encoded by ORF1 and ORF2 of the virus genomes identified in *M. hiemalis* f. *hiemalis* WRL CN(M)12, *Mucor hiemalis* f. *hiemalis* NRRL 3624 *M. hiemalis* f. *corticola* NRRL 3617, *M. hiemalis* f. *corticola* NRRL 3616.

| Virus genomes | sequence identity (%) |       |
|---------------|-----------------------|-------|
|               | ORF1                  | ORF2  |
| MhV1a – MhV1b | 99.8                  | 100.0 |
| MhV1a – MhV2  | 27.9                  | 34.2  |
| MhV1a – MhV3  | 31.4                  | 34.7  |
| MhV1a – MhV4  | 17.1                  | 19.8  |
| MhV2 – MhV3   | 30.3                  | 33.6  |
| MhV2 – MhV4   | 15.7                  | 21.9  |
| MhV3 – MhV4   | 13.1                  | 20.7  |

MhV1a: *Mucor hiemalis* virus 1a; MhV1b: *Mucor hiemalis* virus 1b; MhV2: *Mucor hiemalis* virus 2; MhV3: *Mucor hiemalis* virus 3; MhV4: *Mucor hiemalis* virus 4; ORF1: coat protein; ORF2: RNA dependent RNA polymerase.
